# Supplementary material
Source: publisher site journal article supplement (https://www.degruyter.com/publication/dbid/QPI/downloadAsset/QPI_Liste%20der%20250%20in%20QPI%20enthaltenen%20Volltexte.pdf)
Supplement: Supplementary file 1 [file QPI_Liste%20der%20250%20in%20QPI%20enthaltenen%20Volltexte.pdf]

Deutsch-jüdische Quellen aus Israel/Palästina - Liste der 250 in der Datenbank enthaltenen Volltexte  
(insgesamt ca. 25.000 Seiten)

| lfd Nr | Nachname (Autor) | Vorname (Autor) | Nachname (Autor) | Vorname (Autor) | Nachname (Hrsg.)                                                      | Vorname (Hrsg.) | Nachname (Hrsg.) | Vorname (Hrsg.) | Titel                                                              | Untertitel                                                                    | Titelzusatz                                                                                | Reihentitel            | Verlag                                    | Publikationsort  | Jahr        | Umfang   | ISBN | Typ                             |
|--------|------------------|-----------------|------------------|-----------------|-----------------------------------------------------------------------|-----------------|------------------|-----------------|--------------------------------------------------------------------|-------------------------------------------------------------------------------|--------------------------------------------------------------------------------------------|------------------------|-------------------------------------------|------------------|-------------|----------|------|---------------------------------|
| 1      | Aloni            | Jenny           |                  |                 |                                                                       |                 |                  |                 | In den schmalen Stunden der Nacht                                  |                                                                               | Gedichte                                                                                   |                        | Achdut                                    | Tel Aviv         | 1986/1987   | 111      |      | Literatur                       |
| 2      |                  |                 |                  |                 | Engelmann                                                             | Paul            |                  |                 | Andenken an Karl Kraus                                             |                                                                               |                                                                                            |                        | Mafil Ltd.                                | Tel Aviv         | 1949        | 32       |      | Geschichte                      |
| 3      |                  |                 |                  |                 |                                                                       |                 |                  |                 | Wie kocht man elektrisch                                           |                                                                               |                                                                                            |                        | o.V.                                      | o.O.             | 1935 o.S.   |          |      | Alltags- und Gebrauchsliteratur |
| 4      |                  |                 |                  |                 | Vogel                                                                 | Manfred         |                  |                 | Ariel                                                              |                                                                               | Ein Almanach für Literatur-Graphik-Musik                                                   |                        | Junge Dichtung                            | Jerusalem        | 1941        | 88       |      | Literatur                       |
| 5      | Assaf            | Michael         |                  |                 | Hitachduth Olej Germania                                              |                 |                  |                 | Araber in Palästina                                                |                                                                               |                                                                                            |                        | Palestine Publishing Co. Ltd.             | Tel Aviv         | o.J.        | 67       |      | Politik                         |
| 6      |                  |                 |                  |                 | Kommentiert und eingeleitet von Mirjam Scheuer und Wera Lewin         |                 |                  |                 | Aus neuer Hebräischer Dichtung                                     |                                                                               |                                                                                            |                        | Sefer Press                               | Tel Aviv         | 1949        | 64       |      | Literatur                       |
| 7      | Avidov           | Matias          |                  |                 |                                                                       |                 |                  |                 | Moses                                                              |                                                                               | Schauspiel in 3 Akten                                                                      |                        | Palestine Publishing Co. Ltd.             | Tel Aviv         | o.J.        | 88       |      | Literatur                       |
| 8      |                  |                 |                  |                 | Vereinigung ehemaliger Mitglieder des Bakochba-Hakoah e.V.            |                 |                  |                 | Bar Kochba-Hakoah Nachrichten.                                     | 90 Jahre Bar Kochba-Hakoah Berlin und Makkabi.                                |                                                                                            |                        | o.V.                                      | o.O.             | 1988        | 32       |      | Geschichte                      |
| 9      | Ben Meier        | Ch.             |                  |                 |                                                                       |                 |                  |                 | Die Ermordung Arlosoroffs                                          |                                                                               | Materialien, dem Urteil der Öffentlichkeit unterbreitet                                    |                        | Kooperative Buchdruckerei "Hapoel Hazair" | Tel Aviv         | 1934        | 48       |      | Geschichte                      |
| 10     | Ben Zion         | S[imcha]        |                  |                 | Hauptbureau des KKL                                                   |                 |                  |                 | Die Bilu am Ziel                                                   |                                                                               | Aus dem Hebräischen frei übertragen von Gustav Krojanker                                   | Palästina-Bibliothek 3 | "Omanuth" Verlag                          | Tel Aviv         | 1935        | 91       |      | Literatur                       |
| 11     | Ben Zion         | S[imcha]        |                  |                 | Hauptbureau des KKL                                                   |                 |                  |                 | Die Bilu auf dem Wege                                              |                                                                               | Aus dem Hebräischen frei übertragen von Gustav Krojanker                                   | Palästina-Bibliothek 2 | "Omanuth" Verlag                          | Tel Aviv         | 1935        | 88       |      | Literatur                       |
| 12     | Ben-Chorin       | Schalom         |                  |                 |                                                                       |                 |                  |                 | In dieser Zeit                                                     |                                                                               | Gedichte aus neun Jahren                                                                   |                        | Romema-Edition                            | Jerusalem        | 1942        | 88       |      | Literatur                       |
| 13     | Ben-Chorin       | Schalom         |                  |                 |                                                                       |                 |                  |                 | Jenseits von Orthodoxie und Liberalismus                           | Versuch ueber die juedische Glaubenslage der Gegenwart                        |                                                                                            |                        | Goldstein                                 | Tel Aviv         | 1939        | 134      |      | Religion/Philosophie            |
| 14     | Ben-Chorin       | Schalom         |                  |                 |                                                                       |                 |                  |                 | Jerusalem Blackout                                                 |                                                                               | Miniaturen                                                                                 |                        | Riesefeld & Goetzler                      | Jerusalem        | 1940        | 32       |      | Literatur                       |
| 15     | Ben-Chorin       | Schalom         |                  |                 |                                                                       |                 |                  |                 | Zur religiösen Lage in Palästina                                   | Ein Beitrag zur religiösen Anthropologie der Gegenwart                        |                                                                                            | Niru Nir 1             | Matara                                    | Tel Aviv         | 1940        | 30       |      | Religion/Philosophie            |
| 16     | Ben-Gurion       | David           |                  |                 |                                                                       |                 |                  |                 | Im Ringen um die zionistische Verwirklichung                       |                                                                               | Rede gehalten auf der zionistischen Konferenz im Biltmore-Hotel, New York, am 10. Mai 1942 |                        | Verlag Gëulim                             | Tel Aviv         | 1943        | 31       |      | Politik                         |
| 17     | Ben-Gurion       | David           |                  |                 |                                                                       |                 |                  |                 | Jüdische Arbeit                                                    |                                                                               |                                                                                            |                        | Koop. Arbeiter Buchdruckerei "Achduth"    | Tel Aviv         | 1933        | 92       |      | Politik                         |
| 18     | Ben-Gurion       | David           |                  |                 | Hitachduth Olej Germania                                              |                 |                  |                 | Peel Bericht und Judenstaat                                        |                                                                               |                                                                                            |                        | Palestine Publishing Co.                  | Tel Aviv         | 1938        | 70       |      | Politik                         |
| 19     | Ben-Gurion       | David           |                  |                 |                                                                       |                 |                  |                 | Der Zionismus, seine Faktoren und Aufgaben in unseren Tagen        |                                                                               | Rede, gehalten am 1. April auf der Tagung des Zionistischen Aktions-Comités in Jerusalem   |                        | Verlag der Jewish Agency for Palestine    | Jerusalem/London | 5695 (1935) | 40       |      | Politik                         |
| 20     | Bentwich         | Norman          |                  |                 | Hitachduth Olej Germania we Olej Austria                              |                 |                  |                 | "Perfidus Albion"?                                                 | England und die Engländer                                                     |                                                                                            |                        | Palestine Publishing Co. Ltd.             | Tel Aviv         | 1939        | 141      |      | Politik                         |
| 21     | Bergel-Gronemann | Elfriede        |                  |                 |                                                                       |                 |                  |                 | Begegnung im Spiegel                                               |                                                                               |                                                                                            |                        | P. Freund                                 | Jerusalem        | 1943        | 55       |      | Literatur                       |
| 22     | Bialik           | [Chaim Nachman] |                  |                 | Gesellschaft der Freunde der Hebraeischen Universitaet in Erez Israel |                 |                  |                 | Die Hebraeische Universitaet                                       |                                                                               | Reden und Ansprachen                                                                       |                        | Aziel                                     | Jerusalem        | 1935        | 64       |      | Wissenschaft                    |
| 23     | Herzfeld         | Manfred         |                  |                 |                                                                       |                 |                  |                 | Gruss an Deutschland                                               | Eine Abrechnung in Versen                                                     |                                                                                            |                        | Lychenheim&Son                            | Jerusalem        | 1947        | 27       |      | Literatur                       |
| 24     | bin Gorion       | Emanuel         |                  |                 |                                                                       |                 |                  |                 | Ildo                                                               | Eine Kapitel-Folge aus dem Manuskript "Linien des Lebens"                     |                                                                                            |                        | o.V.                                      | Holon            | 1975        | 50       |      | Literatur                       |
| 25     | bin Gorion       | Emanuel         |                  |                 |                                                                       |                 |                  |                 | Josephus und Jesus                                                 |                                                                               | Vortrag in der Bialik-Loge, Tel Aviv, am 2. Oktober 1972                                   |                        | Moreschet Micha Josef                     | Tel Aviv         | 1973        | 24       |      | Geschichte                      |
| 26     | Bonne            | Alfred          |                  |                 | Hitachduth Olej Germania                                              |                 |                  |                 | Der neue Orient                                                    | Eine Einführung in das Wirtschaftliche und staatliche Werden der Orientländer |                                                                                            |                        | Aziel                                     | Tel Aviv         | 1937        | 89       |      | Geschichte                      |
| 27     |                  |                 |                  |                 | Hitachduth Olej Germania (Redaktion des Textteils)                    |                 |                  |                 | Bord-Merkblatt für die Ankunft in Palästina                        |                                                                               | Herbst-Ausgabe 1935                                                                        |                        | Victor & Landau Ltd.                      | Tel Aviv         | 1935-1937   | 32       |      | Alltags- und Gebrauchsliteratur |
| 28     | Breuer           | Isaac           |                  |                 | Breuer                                                                | Mordechai       |                  |                 | Weltwende                                                          |                                                                               |                                                                                            |                        | Ahva Co-Op. Press                         | Jerusalem        | 1979        | 287      |      | Geschichte                      |
| 29     | Brod             | Max             |                  |                 |                                                                       |                 |                  |                 | Das Diesseitswunder oder Die jüdische Idee und ihre Verwirklichung |                                                                               |                                                                                            |                        | Joachim Goldstein                         | Tel Aviv         | 1939        | 94       |      | Geschichte                      |
| 30     | Brod             | Max             |                  |                 |                                                                       |                 |                  |                 | Die Musik Israels                                                  |                                                                               |                                                                                            |                        | Sefer Press Ltd.                          | Tel Aviv         | 1951        | 66/VIII  |      | Geschichte                      |
| 31     | Brunner          | Constantin      |                  |                 |                                                                       |                 |                  |                 | Briefe                                                             |                                                                               | Bd. 1                                                                                      |                        | Lidor Printing Press                      | Tel Aviv         | 1964        | 240      |      | Geschichte                      |
| 32     | Caspari          | Joachim         |                  |                 |                                                                       |                 |                  |                 | Das Oberbewusstsein                                                | Essays zu einem aus der Biologie entwickelten existentiellen Humanismus       |                                                                                            |                        | Verlag Carmel                             | Haifa            | 1969        | VIII/202 |      | Religion/Philosophie            |

Deutsch-jüdische Quellen aus Israel/Palästina - Liste der 250 in der Datenbank enthaltenen Volltexte  
(insgesamt ca. 25.000 Seiten)

| lfd Nr | Nachname (Autor) | Vorname (Autor) | Nachname (Autor) | Vorname (Autor) | Nachname (Hrsg.)                             | Vorname (Hrsg.) | Nachname (Hrsg.) | Vorname (Hrsg.) | Titel                                                                   | Untertitel                                                                                          | Titelzusatz                                                                              | Reihentitel                                    | Verlag                                | Publikationsort | Jahr         | Umfang | ISBN | Typ                             |
|--------|------------------|-----------------|------------------|-----------------|----------------------------------------------|-----------------|------------------|-----------------|-------------------------------------------------------------------------|-----------------------------------------------------------------------------------------------------|------------------------------------------------------------------------------------------|------------------------------------------------|---------------------------------------|-----------------|--------------|--------|------|---------------------------------|
| 33     | Goldstein        | Walter          |                  |                 |                                              |                 |                  |                 | Die Botschaft Martin Bubers                                             | Bd. 1: Die vordialogische Epoche.                                                                   |                                                                                          | Edition Dr. Peter Freund No. 43                | Edition Dr. Peter Freund              | Jerusalem       | 1952         | 264    |      | Religion/Philosophie            |
| 34     | Cornfeld         | Lilian          |                  |                 | Schüssler                                    | Willy           |                  |                 | Kochen in Kriegszeiten                                                  | Was und wie kocht man im Kriege                                                                     | Mit einem Vorwort von Geoffrey Walsh. Übersetzung aus dem Hebräischen von Alice Holdheim |                                                | Olam Ha'Ishah                         | Tel Aviv        | 1943         | 68     |      | Alltags- und Gebrauchsliteratur |
| 35     | Csokor           | Franz Theodor   |                  |                 |                                              |                 |                  |                 | Das schwarze Schiff                                                     |                                                                                                     | Gedichte                                                                                 |                                                | Verlag Willi Verkauf                  | Jerusalem/Wien  | 1946         | 32     |      | Literatur                       |
| 36     | Diamant          | Paul J.         |                  |                 |                                              |                 |                  |                 | Theodor Herzls väterliche und mütterliche Vorfahre                      | Eine familiengeschichtliche Studie mit einer Ahnentafel                                             |                                                                                          |                                                | Bamberger & Wahrmann                  | Jerusalem       | 1934         | 19     |      | Geschichte                      |
| 37     | Eban             | Ebba            |                  |                 | Gedenkinstitut Yad Vashem, Jerusalem, Israel |                 |                  |                 | Die Massenvernichtung                                                   | Aus dem Buch "Dies ist mein Volk"                                                                   |                                                                                          |                                                | Weiss Press                           | Jerusalem       | o.J.         | 42     |      | Literatur                       |
| 38     | Ehrlicke         | E.              |                  |                 |                                              |                 |                  |                 | Erste Bekundungen I                                                     |                                                                                                     | Gedichte bis 1935 (Hektographie)                                                         | Edition Dr. Peter Freund No. 37                | Edition Dr. Peter Freund              | Jerusalem       | 1949         | 89     |      | Literatur                       |
| 39     | Ehrlicke         | E.              |                  |                 |                                              |                 |                  |                 | Erste Bekundungen II                                                    |                                                                                                     | Gedichte bis 1935 (Hektographie)                                                         |                                                | Edition Dr. Peter Freund              | Jerusalem       | 1949 u. 1953 | 58     |      | Literatur                       |
| 40     |                  |                 |                  |                 | Taussig                                      | Ernst           |                  |                 | Ein Kampf um Wahrheit                                                   | Max Brod zum 65. Geburtstag                                                                         |                                                                                          |                                                | ABC Verlag                            | Tel Aviv        | 1949         | 51     |      | Geschichte                      |
| 41     | Elkana           | Eli             |                  |                 |                                              |                 |                  |                 | Rabbi Lurjes Prophezeiung                                               |                                                                                                     |                                                                                          |                                                | Kedem-Verlag                          | Tel Aviv        | 1939         | 129    |      | Literatur                       |
| 42     | Ermann           | Leo             |                  |                 |                                              |                 |                  |                 | Alten Mannes Fabeleien                                                  | Hörbar unterdrücktes Schreien                                                                       |                                                                                          |                                                | Verlag R. Mass                        | Jerusalem       | 1979         | 110    |      | Literatur                       |
| 43     | Ermann           | Leo             |                  |                 |                                              |                 |                  |                 | Die Fliegerjacke oder die bedingt ehrenvolle Tragödie der Heimgekehrten |                                                                                                     | Roman                                                                                    |                                                | Verlag R. Mass                        | Jerusalem       | 1979         | 406    |      | Literatur                       |
| 44     | Ermann           | Leo             |                  |                 |                                              |                 |                  |                 | Konfusion                                                               |                                                                                                     | Roman                                                                                    |                                                | Verlag Rubin Mass                     | Jerusalem       | 1975         | 308    |      | Literatur                       |
| 45     | Ettinger         | Moshe           |                  |                 |                                              |                 |                  |                 | Verkehrswesen und Verkehrspolitik in Palästina                          |                                                                                                     |                                                                                          |                                                | Buchdruckerei Gebr. Herschbaum        | Jaffa/Tel Aviv  | 1936         | 66     |      | Politik                         |
| 46     | Faerber          | Meir            |                  |                 |                                              |                 |                  |                 | die Israel führen                                                       |                                                                                                     |                                                                                          |                                                | Olamenu                               | Tel Aviv        | 1971         | 215    |      | Politik                         |
| 47     | Faerber          | Meir            |                  |                 |                                              |                 |                  |                 | Residenz Schuschan                                                      |                                                                                                     | Schauspiel in drei Akten. Illustrationen von Isa                                         |                                                | Hozaath "Aetan"                       | Tel Aviv        | 1944         | 93     |      | Literatur                       |
| 48     | Faerber          | Meir            |                  |                 |                                              |                 |                  |                 | Ringende Seelen                                                         |                                                                                                     | Erzählungen                                                                              |                                                | Atasa                                 | Tel Aviv        | 1974         | 196    |      | Literatur                       |
| 49     |                  |                 |                  |                 |                                              |                 |                  |                 | 50 [Jahre]. Freimaurer Loge "Müffelmann zur Treue" i. Or. Tel Aviv      | 1935-1985                                                                                           |                                                                                          |                                                | o.V.                                  | o.O.            | [1985]       | 60     |      | Geschichte                      |
| 50     | Freund           | Ismar           |                  |                 |                                              |                 |                  |                 | Diaspora und Israel                                                     | Das Problem der doppelten Loyalität                                                                 | Im Auftrage der Jewish Agency dargestellt                                                |                                                | Edition: Dr. Peter Freund             | Jerusalem       | 1950         | 89     |      | Politik                         |
| 51     | Fuhrmann         | Ben Zion        |                  |                 |                                              |                 |                  |                 | Hebräisch im Alltag                                                     | Ein praktisches Konversationsbuch                                                                   | (Titel auch hebr.)                                                                       |                                                | [hebr. Verlag des Verfassers]         | Tel Aviv        | 1939         |        |      |                                 |
| 52     | Gold             | Hugo            |                  |                 |                                              |                 |                  |                 | Gedenkbuch der untergegangenen Judengemeinden Mährens                   |                                                                                                     |                                                                                          |                                                | Olamenu                               | Tel Aviv        | 1974         | 166    |      | Geschichte                      |
| 53     | Gold             | Hugo            |                  |                 |                                              |                 |                  |                 | Geschichte der Juden in Österreich.                                     | Ein Gedenkbuch                                                                                      |                                                                                          |                                                | Olamenu                               | Tel Aviv        | 1971         | 176    |      | Geschichte                      |
| 54     | Gold             | Hugo            |                  |                 |                                              |                 |                  |                 | Geschichte der Juden in Wien                                            | Ein Gedenkbuch                                                                                      |                                                                                          |                                                | Olamenu                               | Tel Aviv        | 1966         | 186    |      | Geschichte                      |
| 55     | Gold             | Hugo            |                  |                 |                                              |                 |                  |                 | Österreichische Juden in der Welt.                                      | Ein bibliographisches Lexikon                                                                       |                                                                                          | Schriftenreihe des Zwi Perez Chajes Instituts. | Olamenu                               | Tel Aviv        | 1971         | 51     |      | Geschichte                      |
| 56     | Goldstein        | Walter          |                  |                 |                                              |                 |                  |                 | Die Botschaft Martin Bubers                                             | Bd. 2: Der Dialogik universaler Teil                                                                |                                                                                          | Edition Dr. Peter Freund No. 44                | Edition Dr. Peter Freund              | Jerusalem       | 1953         | 449    |      | Religion/Philosophie            |
| 57     | Goldstein        | Walter          |                  |                 |                                              |                 |                  |                 | Die Botschaft Martin Bubers                                             | Bd. 3: Von der Bibel                                                                                |                                                                                          | Edition Dr. Peter Freund No. 45                | Edition Dr. Peter Freund              | Jerusalem       | 1956         | 467    |      | Religion/Philosophie            |
| 58     | Goldstein        | Walter          |                  |                 |                                              |                 |                  |                 | Die Botschaft Martin Bubers                                             | Bd. 4: Von Chassidismus und Zion                                                                    |                                                                                          | Edition Dr. Peter Freund No. 46                | Edition Dr. Peter Freund              | Jerusalem       | 1958         | 282    |      | Religion/Philosophie            |
| 59     | Goldstein        | Walter          |                  |                 | Präsidium des Herzl-Bundes                   |                 |                  |                 | Chronik des Herzl-Bundes 1912-1962                                      | Die Geschichte einer Zions-Sehnsucht                                                                |                                                                                          |                                                | "Haaretz Press" Ltd.                  | Tel Aviv        | 1962         | 263    |      | Religion/Philosophie            |
| 60     | Goldstein        | Walter          |                  |                 |                                              |                 |                  |                 | Gottes Wittwer und Gottes Boten                                         | Eine vergleichende Betrachtung von Existentialismus and Dialogik. Jean-Paul Sartre und Martin Buber | (Hektographie)                                                                           | Edition Dr. Peter Freund No. 34                | Edition Dr. Peter Freund              | Jerusalem       | 1948         | 117    |      | Religion/Philosophie            |
| 61     | Goldstein        | Walter B.       |                  |                 |                                              |                 |                  |                 | Martin Buber                                                            | Gespräche, Briefe, Worte                                                                            |                                                                                          |                                                | Rubin Mass                            | Jaffa/Tel Aviv  | 1967         | 217    |      | Religion/Philosophie            |
| 62     | Gottgetreu       | Erich           |                  |                 |                                              |                 |                  |                 | Die 37. Belagerung von Jerusalem                                        | Ein Tagebuch aus dem Frühjahr 1948                                                                  |                                                                                          |                                                | Verlag Rubin Mass                     | Jerusalem       | 1985         | 192    |      | Geschichte                      |
| 63     | Granovsky        | A.              |                  |                 | Keren Kayemeth Leisrael, Jerusalem           |                 |                  |                 | Um den Boden Palästinas                                                 |                                                                                                     |                                                                                          | Schriftenreihe zur Bodenfrage 1                | Palestine Publishing Co. Ltd.         | Jerusalem       | 1936         | 89     |      | Politik                         |
| 64     | Gronemann        | Sammy           |                  |                 | The Gronemann's Jubilee Committee            |                 |                  |                 | Der Prozess um des Esels Schatten                                       |                                                                                                     | Komödie in 4 Akten und einem Vorspiel. Frei nach Wielands "Abderiten"                    |                                                | Moadim - Palestinian Play Publishers  | Tel Aviv        | 1945         | 60     |      | Literatur                       |
| 65     | Gronemann        | Sammy           |                  |                 |                                              |                 |                  |                 | Der Weise und der Narr                                                  | König Salomo und der Schuster                                                                       | Ein heiteres Versspiel in sieben Bildern                                                 |                                                | Moadim - Palestinian Play Publishers  | Tel Aviv        | 1942         | 54     |      | Literatur                       |
| 66     |                  |                 |                  |                 | Ha'aretz                                     |                 |                  |                 | 2000 Worte Zeitungshebräisch                                            |                                                                                                     | 2. verbesserte Auflage. (Titel auch hebr.)                                               |                                                | Ha'aretz                              | Tel Aviv        | 1940         | 134    |      | Alltags- und Gebrauchsliteratur |
| 67     | Klepeter         | Otto            |                  |                 |                                              |                 |                  |                 | Leid und Aufschwund                                                     | Lieder aus Israel                                                                                   |                                                                                          |                                                | Edition Olympia - Martin Feuchtwanger | Tel Aviv        | o.J.         | 96     |      | Literatur                       |
| 68     | Harari           | Jacob           |                  |                 | Irgun Olej Merkas Europa, Tel Aviv           |                 |                  |                 | Die Ausrottung der Juden im besetzten Holland                           | Ein Tatsachenbericht                                                                                |                                                                                          |                                                | Achva Printing Press                  | Tel Aviv        | 1944         | 100    |      | Geschichte                      |

Deutsch-jüdische Quellen aus Israel/Palästina - Liste der 250 in der Datenbank enthaltenen Volltexte  
(insgesamt ca. 25.000 Seiten)

| lfd Nr | Nachname (Autor)         | Vorname (Autor) | Nachname (Autor) | Vorname (Autor) | Nachname (Hrsg.)                                                          | Vorname (Hrsg.) | Nachname (Hrsg.) | Vorname (Hrsg.) | Titel                                                       | Untertitel                                                                                       | Titelzusatz                                                                                                                                                                                             | Reihentitel                                   | Verlag                                           | Publikationsort | Jahr   | Umfang | ISBN | Typ                             |
|--------|--------------------------|-----------------|------------------|-----------------|---------------------------------------------------------------------------|-----------------|------------------|-----------------|-------------------------------------------------------------|--------------------------------------------------------------------------------------------------|---------------------------------------------------------------------------------------------------------------------------------------------------------------------------------------------------------|-----------------------------------------------|--------------------------------------------------|-----------------|--------|--------|------|---------------------------------|
| 69     |                          |                 |                  |                 |                                                                           |                 |                  |                 | Hatekuma                                                    | Sammelschrift gewidmet den Problemen des Zionismus und des Jischuw                               | Deutsche Ausgabe nach Ivrith Originalen. Übersetzt von Dr. J. Kastein                                                                                                                                   |                                               | Dayag Press Ltd.                                 | Tel Aviv        | 1939   | 39     |      | Politik                         |
| 70     |                          |                 |                  |                 |                                                                           |                 |                  |                 | Das hebräische Technion, Haifa.                             | 25. Jahresfeier der Grundsteinlegung am Technion in Haifa. Bericht an den 20. Zionistenkongress. |                                                                                                                                                                                                         |                                               | Druckerei Warhaftig                              | Haifa           | 1937   | 22     |      | Wissenschaft                    |
| 71     |                          |                 |                  |                 |                                                                           |                 |                  |                 | Die Hebräische Universität Jerusalem                        |                                                                                                  |                                                                                                                                                                                                         |                                               | Weiss Press                                      | Jerusalem       | 1937/8 | 15     |      | Wissenschaft                    |
| 72     |                          |                 |                  |                 |                                                                           |                 |                  |                 | Die Hebräische Universität in Jerusalem                     |                                                                                                  |                                                                                                                                                                                                         |                                               | The Jerusalem Post Press                         | Jerusalem       | 1964   | 34     |      | Wissenschaft                    |
| 73     | Herrmann                 | Hugo            |                  |                 |                                                                           |                 |                  |                 | Keren Hajessod                                              | Anfänge jüdischer staatsmässiger Finanzpolitik                                                   |                                                                                                                                                                                                         |                                               | Verlag The Erez Israel Palestine Foundation Fund | Jerusalem       | 1938   | 86     |      | Politik                         |
| 74     | Herrmann                 | Hugo            |                  |                 |                                                                           |                 |                  |                 | Palästina heute                                             | Licht und Schatten                                                                               |                                                                                                                                                                                                         |                                               | Hamatarah                                        | Tel Aviv        | 1935   | 249    |      | Geschichte                      |
| 75     | Herzl                    | Theodor         |                  |                 | Goldberg                                                                  | Rosa            | Seelig           | Fanny           |                                                             |                                                                                                  |                                                                                                                                                                                                         |                                               | Haifa Publishing Company                         | Haifa           | 1962   | 220    |      | Literatur                       |
| 76     | Herzl                    | Theodor         |                  |                 |                                                                           |                 |                  |                 | Der Judenstaat                                              |                                                                                                  | 12. Aufl. (1970)                                                                                                                                                                                        |                                               | The Jewish Publishing House                      | Jerusalem       | 1946   | 80     |      | Geschichte                      |
| 77     | Hess                     | Moses           |                  |                 | Zlocisti                                                                  | Theodor         |                  |                 | Rom und Jerusalem                                           | Die letzte Nationalitätenfrage                                                                   |                                                                                                                                                                                                         |                                               | Hozzaah Ivrit Co. Ltd.                           | Tel Aviv        | 1935   | 253    |      | Geschichte                      |
| 78     | Hitachduth Olej Germania |                 |                  |                 |                                                                           |                 |                  |                 | Die deutsche Alijah in Palästina.                           | Bericht der Hitachduth Olej Germania für die Jahre 1936/1937.                                    | Text auch hebr. Doppelte, identische, entgegengesetzte Titelblätter und Texte                                                                                                                           |                                               | Palestine Publishing Co.                         | Tel Aviv        | 1937   | 13     |      | Geschichte                      |
| 79     |                          |                 |                  |                 | Hitachduth Olej Germania                                                  |                 |                  |                 | Rechtswesen in Palästina                                    |                                                                                                  |                                                                                                                                                                                                         | Schriftenreihe der Hitachduth Olej Germania 1 | Victor & Landau, Ltd.                            | Tel Aviv        | 1935   | 57     |      | Geschichte                      |
| 80     | Hoffmann                 | Ludwig          |                  |                 |                                                                           |                 |                  |                 | Gedichte                                                    |                                                                                                  | (Hektographie)                                                                                                                                                                                          |                                               | Edition Peter Freund                             | Jerusalem       | 1941   |        |      | Literatur                       |
| 81     | Horowitz                 | David           |                  |                 | Hitachduth Olei Germania                                                  |                 |                  |                 | Der wirtschaftliche Aufbau Palästinas, 1919-1936.           | Bilanz einer nationalen Kolonisation                                                             |                                                                                                                                                                                                         |                                               | Aziel                                            | Tel Aviv        | 1936   | 39     |      | Geschichte                      |
| 82     | Horwitz                  | Samuel          |                  |                 |                                                                           |                 |                  |                 | Krankenkost                                                 | Wie ernährt sich der Kranke zweckmässig und billig                                               |                                                                                                                                                                                                         |                                               | Verlag Joachim Goldstein                         | Tel Aviv        | 1941   | 94     |      | Alltags- und Gebrauchsliteratur |
| 83     |                          |                 |                  |                 | Tramer                                                                    | Hans            |                  |                 | In zwei Welten                                              | Siegfried Moses zum fünfundsiebzigsten Geburtstag                                                | (Titel und einige Beiträge auch hebr.)                                                                                                                                                                  |                                               | Verlag Bitaon Ltd.                               | Tel Aviv        | 1962   | 650    |      | Geschichte                      |
| 84     |                          |                 |                  |                 | Irgun Olej Merkas Europa                                                  |                 |                  |                 | Die letzten Tage des deutschen Judentums (Berlin Ende 1942) | Ein erschuetterndes Dokument. Bericht eines Augenzeichen                                         |                                                                                                                                                                                                         |                                               | Bitaon Ltd.                                      | Tel Aviv        | 1943   | 42     |      | Geschichte                      |
| 85     |                          |                 |                  |                 | Israel Psycho-Analytical Society                                          |                 |                  |                 | Max Eitington                                               | In Memoriam                                                                                      |                                                                                                                                                                                                         |                                               | o.V.                                             | Jerusalem       | 1950   | 277    |      | Geschichte                      |
| 86     |                          |                 |                  |                 | Yedioth Hayom                                                             |                 |                  |                 | "Von Dan bis Elath"                                         | Das Israel-Buch 1957                                                                             |                                                                                                                                                                                                         |                                               | Or-Verlag                                        | Tel Aviv        | 1957   | 311    |      | Geschichte                      |
| 87     | Italiaander              | Rolf            |                  |                 |                                                                           |                 |                  |                 | Juden in Lateinamerika                                      |                                                                                                  |                                                                                                                                                                                                         |                                               | Olamenu                                          | Tel Aviv        | 1971   | 79     |      | Geschichte                      |
| 88     | [Posener]                | Julius          |                  |                 |                                                                           |                 |                  |                 | In Deutschland                                              | 1945-1946                                                                                        | (Hektographie; 2. Aufl.)                                                                                                                                                                                | Edition Dr. Peter Freund No. 32               | Edition Dr. Peter Freund                         | Tel Aviv        | 1947   | 117    |      | Geschichte                      |
| 89     | Kalischer                | Ben Zwi         |                  |                 |                                                                           |                 |                  |                 | Vom Konzentrationslager nach Palästina                      | Flucht durch die halbe Welt                                                                      |                                                                                                                                                                                                         |                                               | Edition Olympia - Martin Feuchtwanger            | Tel Aviv        | o.J.   | 159    |      | Geschichte                      |
| 90     | Kastein                  | Josef           |                  |                 |                                                                           |                 |                  |                 | Eine Geschichte der Juden                                   |                                                                                                  |                                                                                                                                                                                                         |                                               | R. Löwit                                         | Wien/Jerusalem  | 1938   | 640    |      | Geschichte                      |
| 91     | Kastein                  | Josef           |                  |                 |                                                                           |                 |                  |                 | Das Geschichtserlebnis des Juden                            |                                                                                                  |                                                                                                                                                                                                         |                                               | R. Löwit                                         | Wien/Jerusalem  | 1936   | 32     |      | Geschichte                      |
| 92     | Kastein                  | Josef           |                  |                 |                                                                           |                 |                  |                 | Herodes                                                     | Die Geschichte eines fremden Königs                                                              |                                                                                                                                                                                                         |                                               | R. Löwit                                         | Wien/Jerusalem  | 1936   | 388    |      | Geschichte                      |
| 93     | Kastein                  | Josef           |                  |                 |                                                                           |                 |                  |                 | Jerusalem                                                   | Die Geschichte eines Landes                                                                      |                                                                                                                                                                                                         |                                               | R. Löwit                                         | Wien/Jerusalem  | 1937   | 419    |      | Geschichte                      |
| 94     | Kastein                  | Josef           |                  |                 |                                                                           |                 |                  |                 | Süsskind von Trimberg, oder, Die Tragödie der Heimlosigkeit |                                                                                                  |                                                                                                                                                                                                         |                                               | The Palestine Publishing Company Ltd.            | Jerusalem       | 1934   | 187    |      | Geschichte                      |
| 95     |                          |                 |                  |                 | Hauptbuero des Keren Kayemeth Leisrael                                    |                 |                  |                 | Erez Israel in Zahlen                                       |                                                                                                  | (Hektographie)                                                                                                                                                                                          |                                               | o.V.                                             | Jerusalem       | 1933   | 24     |      | Geschichte                      |
| 96     |                          |                 |                  |                 | Hauptbuero des Keren Kayemeth Leisrael                                    |                 |                  |                 | Erez Israel in Zahlen                                       | 1935                                                                                             | (Hektographie)                                                                                                                                                                                          |                                               | o.V.                                             | Jerusalem       | 1935   | 24     |      | Geschichte                      |
| 97     |                          |                 |                  |                 | Kibbuzim des Haschomer Hazair "Ejn Hakore", "Mischmar Zewulon", "Maanith" |                 |                  |                 | Tschechoslowakische Siedler in Palästina                    | Kibbuzim des Haschomer Hazair "Ejn Hakore", "Mischmar Zewulon", "Maanith"                        |                                                                                                                                                                                                         |                                               | o.V.                                             | Karkur          | 1938   | 30     |      | Geschichte                      |
| 98     |                          |                 |                  |                 |                                                                           |                 |                  |                 | Das kleine jüdische Kochbuch                                | Suppen - Fische - Fleisch. Nationale Gerichte, Pessach Gerichte. 200 und mehr Rezepte            | Neudruck von: "Kochbuch für die jüdische Küche. Bearb. vom Israelitischen Frauenverein Düsseldorf, der Jüdischen Haushaltungsschule Frankfurt am Main und der Jüdischen Kochschule Berlin. Düsseldorf." |                                               | Sinai                                            | Tel Aviv        | o.J.   | 84     |      | Alltags- und Gebrauchsliteratur |

Deutsch-jüdische Quellen aus Israel/Palästina - Liste der 250 in der Datenbank enthaltenen Volltexte  
(insgesamt ca. 25.000 Seiten)

| lfd Nr | Nachname (Autor)                     | Vorname (Autor)  | Nachname (Autor) | Vorname (Autor) | Nachname (Hrsg.)                                            | Vorname (Hrsg.) | Nachname (Hrsg.) | Vorname (Hrsg.) | Titel                                                              | Untertitel                                                                          | Titelzusatz                                                             | Reihentitel                                   | Verlag                                                | Publikationsort    | Jahr | Umfang                 | ISBN | Typ                             |
|--------|--------------------------------------|------------------|------------------|-----------------|-------------------------------------------------------------|-----------------|------------------|-----------------|--------------------------------------------------------------------|-------------------------------------------------------------------------------------|-------------------------------------------------------------------------|-----------------------------------------------|-------------------------------------------------------|--------------------|------|------------------------|------|---------------------------------|
| 99     | Garda                                | Geza             |                  |                 |                                                             |                 |                  |                 | Die Seele der Stummen                                              |                                                                                     | Essay. Aus dem Ungarischen übertragen von Max Rudolfer (Hektographie)   |                                               | o.V.                                                  | Tel Aviv           | 1946 | 43                     |      | Geschichte                      |
| 100    | Krojanker                            | Gustav           |                  |                 |                                                             |                 |                  |                 | Der Transfer                                                       | Eine Schicksalsfrage der zionistischen Bewegung                                     | (Deutsche Ausgabe)                                                      | Schriftenreihe der Hitachduth Olej Germania 4 | Palestine Publishing Co.                              | Tel Aviv           | 1936 | 22                     |      | Geschichte                      |
| 101    | Kurzweil                             | Benedikt         |                  |                 |                                                             |                 |                  |                 | Die jüdische Nachkriegsgeneration in Agnons "Oreach nata lalun"    |                                                                                     |                                                                         |                                               | Edition Dr. Peter Freund                              | Jerusalem          | 1941 | 28                     |      | Geschichte                      |
| 102    |                                      |                  |                  |                 |                                                             |                 |                  |                 | Was sagt man gegen den Transfer?                                   |                                                                                     |                                                                         |                                               | Printing B. Ortner                                    | Tel Aviv           | o.J. | 24                     |      | Politik                         |
| 103    | Landauer                             | Georg            |                  |                 | Hitachduth Olej Germania We Olej Austria                    |                 |                  |                 | Zwischen zwei Revolutionen                                         | Zionistische Betrachtungen zu einigen Fragen der Übergangszeit                      |                                                                         |                                               | Gesher Printing Press                                 | Tel Aviv           | 1942 | 118                    |      | Politik                         |
| 104    | Landmann                             | Kamillo          |                  |                 |                                                             |                 |                  |                 | Israel und die Juden der Welt                                      |                                                                                     |                                                                         |                                               | Olamenu                                               | Tel Aviv           | 1962 | 78                     |      | Geschichte                      |
| 105    | Lasker-Schüler                       | Eise             |                  |                 |                                                             |                 |                  |                 | Mein blaues Klavier                                                | Neue Gedichte                                                                       |                                                                         |                                               | Tashish Books                                         | Jerusalem          | 1957 | 47                     |      | Literatur                       |
| 106    | Lehmann                              | Siegfried        |                  |                 |                                                             |                 |                  |                 | Zur humanistischen Erziehung in Ben-Shemen                         |                                                                                     | (Hektographie)                                                          |                                               | o.V.                                                  | o.O.               | o.J. | 64                     |      | Geschichte                      |
| 107    |                                      |                  |                  |                 |                                                             |                 |                  |                 | Auswahlkatalog der Leihbibliothek Leo Blumstein. 1000 gute Bücher. |                                                                                     | (Titel auch hebr.)                                                      |                                               | Achduth                                               | Tel Aviv           | o.J. | 32                     |      | Alltags- und Gebrauchsliteratur |
| 108    | Lichtheim                            | Richard          |                  |                 |                                                             |                 |                  |                 | Die Geschichte des deutschen Zionismus                             |                                                                                     |                                                                         |                                               | Verlag Rubin Mass                                     | Jerusalem          | 1954 | 285                    |      |                                 |
| 109    | Locker                               | Berl             |                  |                 |                                                             |                 |                  |                 | Was ist sozialistischer Zionismus?                                 |                                                                                     |                                                                         |                                               | Buchdruckerei "Achdut"                                | Tel Aviv           | 1937 | 15                     |      | Politik                         |
| 110    | Magnes                               | J.[udah] L.[eon] |                  |                 |                                                             |                 |                  |                 | Friede in Palästina                                                |                                                                                     | Übersetzung eines Aufsatzes aus "Foreign Affairs" New York, Januar 1943 |                                               | Gesher Printing Press                                 | Jerusalem          | 1943 | 12                     |      | Geschichte                      |
| 111    |                                      |                  |                  |                 | Gold                                                        | Hugo            |                  |                 | Max Brod                                                           | Ein Gedenkbuch. 1884-1968                                                           |                                                                         |                                               | Olamenu                                               | Tel Aviv           | 1969 | 328                    |      | Geschichte                      |
| 112    | Meerbaum-Eisinger                    | Selma            |                  |                 | Rauchwerger                                                 | Adolf           |                  |                 | Blütenlese                                                         |                                                                                     | Gedichte                                                                |                                               | o.V.                                                  | Tel Aviv           | 1979 | 136                    |      | Literatur                       |
| 113    |                                      |                  |                  |                 | Rothschild                                                  | Eli             |                  |                 | Meilensteine                                                       | Vom Wege des Kartells Jüdischer Verbindungen (K.J.V.) in der zionistischen Bewegung | Eine Sammelschrift                                                      |                                               | Peli Printing Works Ltd.                              | Tel Aviv/Givatayim | 1972 | 418                    |      | Geschichte                      |
| 114    |                                      |                  |                  |                 | Ben-Chorin                                                  | Schalom         | Stern            | Gerson          | Menora                                                             | Eine Auswahl literarischen Schaffens in Erez-Israel                                 |                                                                         |                                               | Menke                                                 | Tel Aviv           | 1941 | 124                    |      | Literatur                       |
| 115    | Mühsam                               | Paul             |                  |                 |                                                             |                 |                  |                 | Erinnerungen, Betrachtungen, Gestalten                             |                                                                                     | (Hektographie)                                                          |                                               | Als Manuskript vervielfältigt                         | Jerusalem          | 1959 | 159                    |      | Geschichte                      |
| 116    | Mühsam                               | Paul             |                  |                 |                                                             |                 |                  |                 | Mein Weltbild                                                      | Eine Deutung der Welt und des Lebens                                                |                                                                         | Edition Dr. Peter Freund No. 42               | Edition Dr. Peter Freund                              | Jerusalem          | 1951 | 109                    |      | Geschichte                      |
| 117    | Mühsam                               | Paul             |                  |                 |                                                             |                 |                  |                 | Sonette an den Tod                                                 |                                                                                     | (Hektographie)                                                          | Edition Dr. Peter Freund No. 38               | Edition Dr. Peter Freund                              | Jerusalem          | 1949 | 13 ungebundene Blätter |      | Literatur                       |
| 118    |                                      |                  |                  |                 | Council of Jews from Germany, London - Jerusalem - New York |                 |                  |                 | Nach dem Eichmann Prozess                                          | Zu einer Kontroverse über die Haltung der Juden                                     |                                                                         |                                               | Bitaan Publishing Co. Ltd.                            | Tel Aviv           | 1963 | 103                    |      | Geschichte                      |
| 119    | Anonym [Nebenzahl]                   | [Ernst]          |                  |                 |                                                             |                 |                  |                 | Über palästinensische Rechtsverhältnisse                           |                                                                                     |                                                                         |                                               | J. Japhet & Co. LTD.                                  | Jerusalem          | 1934 | 16                     |      | Geschichte                      |
| 120    |                                      |                  |                  |                 | Keren Hajessod. Abteilung für Einwanderer aus Deutschland   |                 |                  |                 | Der Vater des Jischuw... und die Zukunft                           |                                                                                     |                                                                         |                                               | Kooperative Buchdruckerei "Hapoel Hazair"             | Tel Aviv           | o.J. | 15                     |      | Geschichte                      |
| 121    |                                      |                  |                  |                 |                                                             |                 |                  |                 | Palästina-Hagadah                                                  |                                                                                     | (Titel hebr., Text dt. u. hebr.)                                        |                                               | Palestine Publishing Co.                              | Tel Aviv           | 1938 | 47 dt./47 dt.          |      | Religion/Philosophie            |
| 122    |                                      |                  |                  |                 |                                                             |                 |                  |                 | Palnews                                                            | Wirtschafts-Jahrbuch für Palaestina                                                 | 1935                                                                    |                                               | Verlag "Palnews"                                      | Tel Aviv           | 1935 | 320                    |      | Geschichte                      |
| 123    | Perlmutter                           | E.               |                  |                 |                                                             |                 |                  |                 | Deutsch-hebräisches Wörterbuch für Zahnärzte                       |                                                                                     | (Titel auch hebr.)                                                      |                                               | Verlag Zahnärzterverband Palästinas, Ortsgruppe Haifa | Haifa              | 1938 | 57                     |      | Alltags- und Gebrauchsliteratur |
| 124    |                                      |                  |                  |                 | Freund                                                      | Peter           |                  |                 | Blätter des Peter Freund Verlages                                  |                                                                                     | Nr. 1 Oktober-November 1942 (Hektographie)                              |                                               | Peter Freund Verlag                                   | Jerusalem          | 1942 | 12                     |      | Zeitschrift                     |
| 125    | Pistiner                             | Ephraim          |                  |                 |                                                             |                 |                  |                 | Ein Mensch fliegt zu einem anderen Stern                           |                                                                                     | Schauspiel in fünf Akten                                                |                                               | Humanitas                                             | Tel Aviv           | 1965 | 113                    |      | Literatur                       |
| 126    | Politzer                             | Heinz            |                  |                 |                                                             |                 |                  |                 | Gedichte                                                           |                                                                                     | (Hektographie)                                                          |                                               | Edition: Peter Freund                                 | Jerusalem          | 1941 | 48                     |      |                                 |
| 127    |                                      |                  |                  |                 |                                                             |                 |                  |                 | Proverbia Judaeorum Erotica et Turpia                              | Jüdische Sprichwörter erotischen und rustikalen Inhalts                             |                                                                         |                                               | Renaissance Publishing House                          | Haifa              | 1972 | 70                     |      | Geschichte                      |
| 128    | Reubeni [pseud., i.e. Faerber, Meir] | Meir             |                  |                 |                                                             |                 |                  |                 | Mein Tel Aviv                                                      |                                                                                     | Satiren                                                                 |                                               | Verlag "Atid"                                         | Tel Aviv           | 1940 | 32                     |      | Literatur                       |
| 129    |                                      |                  |                  |                 |                                                             |                 |                  |                 | Robert Weltsch zum 60. Geburtstag                                  | Ein Glueckwunsch gewidmet von Freunden                                              |                                                                         |                                               | Privatdruck                                           | Tel Aviv/Jerusalem | 1951 | 8                      |      | Geschichte                      |
| 130    |                                      |                  |                  |                 | Tramer                                                      | Hans            | Loewenstein      | Kurt            | Robert Weltsch zum 70. Geburtstag von seinen Freunden              | 20. Jun 61                                                                          |                                                                         |                                               | Verlag Bitaan                                         | Tel Aviv           | 1961 | 219                    |      | Geschichte                      |

| lfd Nr | Nachname (Autor)                      | Vorname (Autor) | Nachname (Autor) | Vorname (Autor) | Nachname (Hrsg.)                       | Vorname (Hrsg.) | Nachname (Hrsg.) | Vorname (Hrsg.) | Titel                                                                          | Untertitel                                                                                                                 | Titelzusatz                                                                                                               | Reihentitel                               | Verlag                                          | Publikationsort  | Jahr      | Umfang | ISBN | Typ                             |
|--------|---------------------------------------|-----------------|------------------|-----------------|----------------------------------------|-----------------|------------------|-----------------|--------------------------------------------------------------------------------|----------------------------------------------------------------------------------------------------------------------------|---------------------------------------------------------------------------------------------------------------------------|-------------------------------------------|-------------------------------------------------|------------------|-----------|--------|------|---------------------------------|
| 131    | Rosch-Pinnah [i.e. Ettisch, Ernst E.] | Elijahu         |                  |                 |                                        |                 |                  |                 | Astrologie im hebräischen Alphabet                                             | Die Buchstaben ך' ספגו, ihr Alter und ihre astrologische Bedeutung, nebst einer Studie über das Wort ך' in I. Samuel, 4,13 | (Exportausgabe)                                                                                                           |                                           | Verlag Transocean and Palestine Ltd.            | Tel Aviv         | 1952      | 39     |      | Religion/Philosophie            |
| 132    | Rosch-Pinnah [i.e. Ettisch, Ernst E.] | Elijahu         |                  |                 |                                        |                 |                  |                 | Hebraeisch                                                                     | Ein uraltes Hieroglyphensystem                                                                                             |                                                                                                                           |                                           | Verlag Transocean and Palestine Ltd.            | Tel Aviv         | 1951      | 199    |      | Wissenschaft                    |
| 133    | Ruppin                                | Arthur          |                  |                 |                                        |                 |                  |                 | Erinnerungen                                                                   |                                                                                                                            | Bd. 1. Jugend- und Studentenzeit. 1876-1907                                                                               |                                           | Bitoon                                          | Tel Aviv         | 1945      | 162    |      | Geschichte                      |
| 134    | Sborowitz                             | Arie            |                  |                 |                                        |                 |                  |                 | Offenbarung und Offenbarungsreligion in Franz Rosenzweigs "Stern der Erlösung" |                                                                                                                            |                                                                                                                           | Niru Nir 7                                | Romema-Verlag                                   | Jerusalem        | 1942      | 66     |      | Religion/Philosophie            |
| 135    | Scharon [Schwadron]                   | Abraham         |                  |                 |                                        |                 |                  |                 | Erschreckende Zahlen                                                           |                                                                                                                            |                                                                                                                           |                                           | Hauptverkauf: Buchhandlung "Achisaf", Jerusalem | Jerusalem        | 1937      | 20     |      | Geschichte                      |
| 136    | Schwarz                               | Dora            |                  |                 |                                        |                 |                  |                 | Kochbuch                                                                       | Anleitung und Rezepte zur Herstellung einer vollwertigen und der Gesundheit zuträglichen Nahrung                           | (2. Aufl. 1960)                                                                                                           |                                           | o.V.                                            | [Sichron Jaacov] | 1955      | 80     |      | Alltags- und Gebrauchsliteratur |
| 137    |                                       |                 |                  |                 | Hauptbuero des Keren Kayemeth Leisrael |                 |                  |                 | Bath-Ami                                                                       | Bulletin fuer zionistische Frauenorganisationen                                                                            | XI. Jahrgang Heft 2 (29), Januar 1939. (erschienen 1929-1940)                                                             |                                           | "Achva" Cooperative Printing Press. Ltd.        | Jerusalem        | 1939      |        |      | Zeitschrift                     |
| 138    | Singer                                | Irma            |                  |                 | Hauptbüro des KKL                      |                 |                  |                 | Kelle und Schwert                                                              | Aus den Heldentagen von Daganja.                                                                                           | Zeichnungen von Otto Wallisch                                                                                             | Heimat. Palästina-Bibliothek für Kinder 3 | "Omanuth"-Verlag                                | Tel Aviv         | 1935      | 34     |      | Literatur                       |
| 139    | Singer                                | Irma            |                  |                 | Hauptbüro des KKL                      |                 |                  |                 | Die Sage von Dilb                                                              |                                                                                                                            | Zeichnungen von G. Wolf Krakauer                                                                                          | Heimat. Palästina-Bibliothek für Kinder 1 | "Omanuth"-Verlag                                | Tel Aviv         | 1935      | 32     |      | Literatur                       |
| 140    |                                       |                 |                  |                 |                                        |                 |                  |                 | Der Kämpfer.                                                                   | Einmalige Ausgabe der "Deutschen Kreise" in der Pal. Arbeiterpartei Poale-Zion-Chugim Marxistim.                           | (Juli 1936)                                                                                                               |                                           | o.V.                                            | Tel Aviv         | 1936      | 32     |      | Politik                         |
| 141    |                                       |                 |                  |                 | Pinczower                              |                 |                  |                 | Sport bei den Juden im Altertum                                                | Die Rennbahn des Königs Salomo. Nach einem handschriftlichen Midrasch der Staatsbibliothek München, cod. 222 fol. 50a-56b. | Reprographischer Nachdruck der Ausgabe von 1930                                                                           |                                           | Selbstverlag des Verfassers                     | Tel Aviv         | 1968      | [4]    |      | Geschichte                      |
| 142    | Sternheim                             | Walter A.       |                  |                 |                                        |                 |                  |                 | Das Wildpferd                                                                  | Gedichte I                                                                                                                 | (Hektographie)                                                                                                            | Edition Dr. Peter Freund                  | Edition Dr. Peter Freund                        | Jerusalem        | 1942      | [14]   |      | Literatur                       |
| 143    | Sternheim                             | Walter A.       |                  |                 |                                        |                 |                  |                 | Der erste Tag                                                                  | Gedichte II                                                                                                                | (Hektographie)                                                                                                            | Edition Dr. Peter Freund                  | Edition Dr. Peter Freund                        | Jerusalem        | 1942      | [16]   |      | Literatur                       |
| 144    | Sternheim                             | Walter A.       |                  |                 |                                        |                 |                  |                 | Der neue Prometheus                                                            | Gedichte III                                                                                                               | (Hektographie)                                                                                                            | Edition Dr. Peter Freund                  | Edition Dr. Peter Freund                        | Jerusalem        | 1942      | [48]   |      | Literatur                       |
| 145    | W.A.St. [Sternheim, Walter A.]        |                 |                  |                 |                                        |                 |                  |                 | Notabene...                                                                    |                                                                                                                            | (Hektographie)                                                                                                            |                                           | o.V.                                            | Jerusalem        | 1942      | 11     |      | Literatur                       |
| 146    | Sternheim                             | Walter A.       |                  |                 |                                        |                 |                  |                 | Der Storchenzug                                                                |                                                                                                                            | Dichtungen. (Hektographie)                                                                                                |                                           | Peter Freund Verlag                             | Jerusalem        | 1943      | [19]   |      | Literatur                       |
| 147    | Radler-Feldmann                       | J.              |                  |                 |                                        |                 |                  |                 | Zur Arabischen Frage                                                           | Ein Wort in zwölfter Studne!                                                                                               |                                                                                                                           |                                           | Buchdruckerei Azriel                            | Jerusalem        | 1936      | 16     |      | Politik                         |
| 148    | Sturmann                              | Manfred         |                  |                 |                                        |                 |                  |                 | Gedichte                                                                       |                                                                                                                            | (Hektographie)                                                                                                            | Edition Dr. Peter Freund                  | Edition Dr. Peter Freund                        | Jerusalem        | 1941      | 45     |      | Literatur                       |
| 149    | Theilhaber                            | Felix A.        |                  |                 |                                        |                 |                  |                 | Judenschicksal                                                                 | Acht Biographien                                                                                                           |                                                                                                                           |                                           | Edition Olympia - Martin Feuchtwanger           | Tel Aviv         | o.J.      | 323    |      | Wissenschaft                    |
| 150    | Torczyner                             | Joshua          |                  |                 |                                        |                 |                  |                 | Mörder - schrie ich Eichmann an...                                             |                                                                                                                            |                                                                                                                           |                                           | Brith Hakoah 1909                               | Tel Aviv         | 1975      | 48     |      | Geschichte                      |
| 151    | Tramer                                | Hans            |                  |                 |                                        |                 |                  |                 | Michal                                                                         | Liebe und Leid einer Königin                                                                                               |                                                                                                                           |                                           | Matara                                          | Tel Aviv         | 1940      | 96     |      | Literatur                       |
| 152    | Tramer                                | Hans            |                  |                 |                                        |                 |                  |                 | Die Verantwortung des Dichters                                                 |                                                                                                                            |                                                                                                                           | Freagen der Zeit 1                        | Verlag Joachim Goldstein & Co.                  | Tel Aviv         | 1939      | 31     |      | Geschichte                      |
| 153    | Tramer                                | Hans            |                  |                 |                                        |                 |                  |                 | Zionistisches Mönchtum und jüdische Wirklichkeit                               | Ein Wort an die "Idealisten" unter uns                                                                                     |                                                                                                                           | Palästina im Kriege. Eine Schriftenfolge  | Matara                                          | Tel Aviv         | 1939      | 11     |      | Geschichte                      |
| 154    |                                       |                 |                  |                 |                                        |                 |                  |                 | ABC des Luftschatzes und der Ersten Hilfe in Erez Israel                       |                                                                                                                            | Ausgabe für den Deutschsprachigen Teil des Jischuw. Mit Auszügen aus dem Offiziellen A.R.P. Handbuch für Haus und Familie |                                           | Dayag Press Ltd.                                | T.[el] A.[viv]   | [1940]    | 48     |      | Alltags- und Gebrauchsliteratur |
| 155    | Weinberg                              | Jehuda Louis    |                  |                 |                                        |                 |                  |                 | Aus der Frühzeit des Zionismus                                                 | Heinrich Loewe                                                                                                             |                                                                                                                           |                                           | Verlag Rubin Mass                               | Jerusalem        | 1946      | 263    |      | Geschichte                      |
| 156    | Kastein                               | Josef           |                  |                 |                                        |                 |                  |                 | Wege und Irrwege                                                               | Drei Essays zur Kultur der Gegenwart                                                                                       |                                                                                                                           |                                           | Edition Olympia - Martin Feuchtwanger           | Tel Aviv         | o.J.      | 110    |      | Geschichte                      |
| 157    | Weitzmann                             | Sigfried        |                  |                 |                                        |                 |                  |                 | Studie über Kafka                                                              |                                                                                                                            | Mit einem Vorwort von Robert Weitsch                                                                                      |                                           | Olamenu                                         | Tel Aviv         | 1970      | 130    |      | Geschichte                      |
| 158    | Wolfsberg                             | Oskar           |                  |                 |                                        |                 |                  |                 | Judentum und Gegenwart                                                         |                                                                                                                            |                                                                                                                           |                                           | Messilah-Verlag                                 | Tel Aviv         | 1941      | 273    |      | Geschichte                      |
| 159    | Yourgrau                              | Wolfgang        |                  |                 |                                        |                 |                  |                 | Der Nahe Osten - Gewehr bei Fuss!                                              |                                                                                                                            |                                                                                                                           | Palästina im Kriege. Eine Schriftenfolge  | Matara                                          | Tel Aviv         | 1938      | 16     |      | Geschichte                      |
| 160    |                                       |                 |                  |                 |                                        |                 |                  |                 | Z-A-G-Blätter fuer die Mitglieder der Zionistisch-Akademischen Gesellschaft    |                                                                                                                            | (Titel auch hebräisch; Text dt., hebr., engl.)                                                                            |                                           | Druckerei Azriel/Dayag Press (wechselsend)      | Tel Aviv         | 1937-1938 |        |      | Zeitschrift                     |
| 161    | Zemach                                | Shlomo          |                  |                 |                                        |                 |                  |                 | Das jüdische Dorf                                                              |                                                                                                                            |                                                                                                                           |                                           | Keren Hajessod                                  | Jerusalem        | 1933      | 32     |      | Geschichte                      |

| lfd Nr | Nachname (Autor)                                               | Vorname (Autor) | Nachname (Autor) | Vorname (Autor) | Nachname (Hrsg.)                                                                                                  | Vorname (Hrsg.) | Nachname (Hrsg.) | Vorname (Hrsg.) | Titel                                                                  | Untertitel                          | Titelzusatz                                                                                    | Reihentitel | Verlag                                | Publikationsort | Jahr      | Umfang | ISBN | Typ                  |
|--------|----------------------------------------------------------------|-----------------|------------------|-----------------|-------------------------------------------------------------------------------------------------------------------|-----------------|------------------|-----------------|------------------------------------------------------------------------|-------------------------------------|------------------------------------------------------------------------------------------------|-------------|---------------------------------------|-----------------|-----------|--------|------|----------------------|
| 162    | Zlocisti                                                       | Theodor         |                  |                 |                                                                                                                   |                 |                  |                 | Klimatologie und Pathologie Palästinas                                 |                                     |                                                                                                |             | Omanuth                               | Tel Aviv        | 1937      | 176    |      | Wissenschaft         |
| 163    | Zohn                                                           | Harry           |                  |                 |                                                                                                                   |                 |                  |                 | Österreichische Juden in der Literatur                                 |                                     | Ein bio-bibliographisches Lexikon                                                              |             | Olamenu                               | Tel Aviv        | 1969      | 61     |      | Geschichte           |
| 164    |                                                                |                 |                  |                 | Ramoth Haschawim, Hg.                                                                                             |                 |                  |                 | [Ramoth Haschawim] 1933-1943 (Originaltitel hebr.)                     |                                     | (Hektographie)                                                                                 |             | OFA                                   | Tel Aviv        | [1943]    | 59     |      | Geschichte           |
| 165    | Zweig                                                          | Max             |                  |                 | Benyoetz                                                                                                          | Elazar          |                  |                 | Der Generalsekretär und andere Dramen                                  |                                     | Mit Essays über Max Zweig von Max Brod, Israel Mehlmann, Walter Schmähling und Elazar Benyoetz |             | o.V.                                  | Tel Aviv        | 1979      | 311    |      | Literatur            |
| 166    | Calvary                                                        | Moses           |                  |                 |                                                                                                                   |                 |                  |                 | Das Wagnis des Glaubens                                                |                                     | Vortrag gehalten am 23. Teweth 5702 in Beth Jizchak                                            |             | Feuerring Memorial Trust              | Jerusalem       | 1942      | 18     |      | Religion/Philosophie |
| 167    | Komitee zur öffentlichen Kontrolle des Handels mit Deutschland |                 |                  |                 |                                                                                                                   |                 |                  |                 | Was ist Transfer?                                                      |                                     |                                                                                                |             | o.V.                                  | o.O.            | 1934      | 19     |      | Politik              |
| 168    | Weinberg                                                       | Jehuda Louis    |                  |                 |                                                                                                                   |                 |                  |                 | In den Vorhöfen des Heiligtums                                         |                                     | Sonette                                                                                        |             | Edition Olympia - Martin Feuchtwanger | Tel Aviv        | 1950      | 114    |      | Literatur            |
| 169    | Ernwil [i.e. Ernst Wilhelm]                                    |                 |                  |                 |                                                                                                                   |                 |                  |                 | Kennst Du das Land?                                                    | Zeitgedichte aus Israel (1950-1981) |                                                                                                |             | o.V.                                  | o.O.            | 1981      | 26     |      | Literatur            |
| 170    |                                                                |                 |                  |                 | Königsberger                                                                                                      | Annemarie       | Avi-Yonah        | Eva             | Lyris                                                                  | Deutschsprachige Lyrik aus Israel   | Heft II (1986/1987) (erschienen 1985-2000)                                                     |             | o.V.                                  | Jerusalem       | 1986/1987 | 62     |      | Literatur            |
| 171    |                                                                |                 |                  |                 | Königsberger                                                                                                      | Annemarie       | Avi-Yonah        | Eva             | Lyris                                                                  | Deutschsprachige Lyrik aus Israel   | Heft III (1988) (erschienen 1985-2000)                                                         |             | o.V.                                  | Jerusalem       | 1988      | 91     |      | Literatur            |
| 172    |                                                                |                 |                  |                 | Königsberger                                                                                                      | Annemarie       | Avi-Yonah        | Eva             | Lyris                                                                  | Deutschsprachige Lyrik aus Israel   | Heft IV (1990) (erschienen 1985-2000)                                                          |             | o.V.                                  | Jerusalem       | 1990      | 102    |      | Literatur            |
| 173    |                                                                |                 |                  |                 | Königsberger                                                                                                      | Annemarie       | Avi-Yonah        | Eva             | Lyris                                                                  | Deutschsprachige Lyrik aus Israel   | Heft V (1993) (erschienen 1985-2000)                                                           |             | o.V.                                  | Jerusalem       | 1993      | 87     |      | Literatur            |
| 174    |                                                                |                 |                  |                 | Königsberger                                                                                                      | Annemarie       | Avi-Yonah        | Eva             | Lyris                                                                  | Deutschsprachige Lyrik aus Israel   | Heft VI (1997) (erschienen 1985-2000)                                                          |             | o.V.                                  | Jerusalem       | 1997      | 128    |      | Literatur            |
| 175    |                                                                |                 |                  |                 | Königsberger                                                                                                      | Annemarie       | Avi-Yonah        | Eva             | Lyris                                                                  | Deutschsprachige Lyrik aus Israel   | Heft VII (2000) (erschienen 1985-2000)                                                         |             | o.V.                                  | Jerusalem       | 2000      | 132    |      | Literatur            |
| 176    |                                                                |                 |                  |                 | Constantin Brunner Gemeinschaft                                                                                   |                 |                  |                 | Interne Zeitschrift                                                    |                                     | Achter Jahrgang, Nr. 1, (23) August 1953 (Hektographie) (erschienen 1946-1953)                 |             | o.V.                                  | o.O.            | 1953      | 39     |      | Zeitschrift          |
| 177    |                                                                |                 |                  |                 | Constantin Brunner Gemeinschaft                                                                                   |                 |                  |                 | Interne Zeitschrift                                                    |                                     | Siebenter Jahrgang Nr. 3 (22) April 1953 (Hektographie) (erschienen 1946-1953)                 |             | o.V.                                  | o.O.            | 1953      | 44     |      | Zeitschrift          |
| 178    |                                                                |                 |                  |                 | Constantin Brunner Gemeinschaft                                                                                   |                 |                  |                 | Interne Zeitschrift                                                    |                                     | Vierter Jahrgang, Nr. 11 (1) August 1949 (erschienen 1946-1953)                                |             | o.V.                                  | o.O.            | 1949      | 52     |      | Zeitschrift          |
| 179    |                                                                |                 |                  |                 | Constantin Brunner Gemeinschaft                                                                                   |                 |                  |                 | Interne Zeitschrift                                                    |                                     | Heft 10. April 1949 (erschienen 1946-1953)                                                     |             | o.V.                                  | o.O.            | 1949      | 46     |      | Zeitschrift          |
| 180    |                                                                |                 |                  |                 | Constantin Brunner Gemeinschaft                                                                                   |                 |                  |                 | Interne Zeitschrift                                                    |                                     | Heft 8. August 1948 (erschienen 1946-1953)                                                     |             | o.V.                                  | o.O.            | 1948      | 52     |      | Zeitschrift          |
| 181    |                                                                |                 |                  |                 | Exekutive der Zionistischen Weltorganisation und den Hauptbüros des Keren Kayemeth Leisrael und des Keren Hajesod |                 |                  |                 | Bibliographisches Bulletin des zionistischen Zentralarchivs, Jerusalem |                                     | Heft IX: (2. Jahrgang, Heft 3) (Abgeschlossen 1. Juni 1938) (erschienen 1936-1938)             |             | o.V.                                  | Jerusalem       | 1938      | 22     |      | Zeitschrift          |
| 182    |                                                                |                 |                  |                 | Exekutive der Zionistischen Weltorganisation und den Hauptbüros des Keren Kayemeth Leisrael und des Keren Hajesod |                 |                  |                 | Bibliographisches Bulletin des zionistischen Zentralarchivs, Jerusalem |                                     | Heft VIII (2. Jahrgang, Heft 2) (Abgeschlossen 1. April 1938) (erschienen 1936-1938)           |             | o.V.                                  | Jerusalem       | 1938      | 18     |      | Zeitschrift          |
| 183    |                                                                |                 |                  |                 | Exekutive der Zionistischen Weltorganisation und den Hauptbüros des Keren Kayemeth Leisrael und des Keren Hajesod |                 |                  |                 | Bibliographisches Bulletin des zionistischen Zentralarchivs, Jerusalem |                                     | Heft VII (2. Jahrgang, Heft 1) (abgeschlossen 20. Januar 1938) (erschienen 1936-1938)          |             | o.V.                                  | Jerusalem       | 1938      | 21     |      | Zeitschrift          |
| 184    |                                                                |                 |                  |                 | Exekutive der Zionistischen Weltorganisation und den Hauptbüros des Keren Kayemeth Leisrael und des Keren Hajesod |                 |                  |                 | Bibliographisches Bulletin des zionistischen Zentralarchivs, Jerusalem |                                     | Heft VI: September-Oktober 1937 (abgeschlossen 15. Nov. 1937) (erschienen 1936-1938)           |             | o.V.                                  | Jerusalem       | 1937      | 24     |      | Zeitschrift          |
| 185    |                                                                |                 |                  |                 | Exekutive der Zionistischen Weltorganisation und den Hauptbüros des Keren Kayemeth Leisrael und des Keren Hajesod |                 |                  |                 | Bibliographisches Bulletin des zionistischen Zentralarchivs, Jerusalem |                                     | Heft IV/V: Mai-August 1937 (abgeschlossen 10. Sept. 1937) (erschienen 1936-1938)               |             | o.V.                                  | Jerusalem       | 1937      | 31     |      | Zeitschrift          |

| lfd Nr | Nachname (Autor)                      | Vorname (Autor) | Nachname (Autor)                 | Vorname (Autor) | Nachname (Hrsg.)                                                                                                  | Vorname (Hrsg.) | Nachname (Hrsg.) | Vorname (Hrsg.) | Titel                                                                                                               | Untertitel                                                                             | Titelzusatz                                                                                                                      | Reihentitel                               | Verlag                                | Publikationsort | Jahr | Umfang | ISBN | Typ                             |
|--------|---------------------------------------|-----------------|----------------------------------|-----------------|-------------------------------------------------------------------------------------------------------------------|-----------------|------------------|-----------------|---------------------------------------------------------------------------------------------------------------------|----------------------------------------------------------------------------------------|----------------------------------------------------------------------------------------------------------------------------------|-------------------------------------------|---------------------------------------|-----------------|------|--------|------|---------------------------------|
| 186    |                                       |                 |                                  |                 | Exekutive der Zionistischen Weltorganisation und den Hauptbüros des Keren Kayemeth Leisrael und des Keren Hajesod |                 |                  |                 | Bibliographisches Bulletin des zionistischen Zentralarchivs, Jerusalem                                              |                                                                                        | Heft III: März-April 1937 (abgeschlossen 5. Mai 1937) (erschien 1936-1938)                                                       |                                           | o.V.                                  | Jerusalem       | 1937 | 17     |      | Zeitschrift                     |
| 187    |                                       |                 |                                  |                 | Exekutive der Zionistischen Weltorganisation und den Hauptbüros des Keren Kayemeth Leisrael und des Keren Hajesod |                 |                  |                 | Bibliographisches Bulletin des zionistischen Zentralarchivs, Jerusalem                                              |                                                                                        | Heft I: November-Dezember 1936 (abgeschlossen am 25. Dezember 1936) (erschien 1936-1938)                                         |                                           | o.V.                                  | Jerusalem       | 1936 | 16     |      | Zeitschrift                     |
| 188    |                                       |                 |                                  |                 | Exekutive der Zionistischen Weltorganisation und den Hauptbüros des Keren Kayemeth Leisrael und des Keren Hajesod |                 |                  |                 | Bibliographisches Bulletin des zionistischen Zentralarchivs, Jerusalem                                              |                                                                                        | Heft 10-12: (2. Jahrgang, Heft 4-6) (abgeschlossen am 1. Dez. 1938) (erschien 1936-1938)                                         |                                           | o.V.                                  | Jerusalem       | 1938 | 27     |      | Zeitschrift                     |
| 189    | Labensohn                             | Lenny           | Israelisches Informationszentrum |                 |                                                                                                                   |                 |                  |                 | Ein PLO Staat                                                                                                       | Lebensgefahr                                                                           |                                                                                                                                  |                                           | Isratypeset                           |                 | 1978 |        |      | Politik                         |
| 190    |                                       |                 |                                  |                 | Alija Chadascha                                                                                                   |                 |                  |                 | 10 Jahre neue Alijah                                                                                                |                                                                                        |                                                                                                                                  |                                           | "Zurah" Advertising                   | Tel Aviv        | o.J. | 80     |      | Geschichte                      |
| 191    |                                       |                 |                                  |                 | Miflegeth Poale Erez-Jisrael, Abteilung fuer die Olim aus Mitteleuropa                                            |                 |                  |                 | Alija Chadascha - wohin?                                                                                            |                                                                                        | (Ein Artikel im «Mitteilungsblatt» und die Antwort der hebraeischen Presse)                                                      |                                           | Shoshani's Printing Co. Ltd.          | Tel Aviv        | o.J. | 15     |      | Geschichte                      |
| 192    |                                       |                 |                                  |                 | Alija Chadascha Owedeth                                                                                           |                 |                  |                 | Die Histadruth                                                                                                      | Wirtschaftliche Probleme in der Kriegszeit                                             |                                                                                                                                  |                                           | Haaretz Press Ltd.                    | Tel Aviv        | 1944 | 87     |      | Politik                         |
| 193    | Hauptbüro des Keren Kayemeth Leisrael |                 |                                  |                 |                                                                                                                   |                 |                  |                 | Der Emek                                                                                                            |                                                                                        | (Emek Jesreel)                                                                                                                   |                                           | Goldberg                              | Jerusalem       | 1930 | 30     |      | Geschichte                      |
| 194    | Weichselbaum                          | S.              |                                  |                 |                                                                                                                   |                 |                  |                 | Hundert Bäume                                                                                                       |                                                                                        | Zeichnungen von Otto Wallisch                                                                                                    | Heimat. Palästina-Bibliothek für Kinder 2 | Omanuth-Verlag                        | Jerusalem       | 1935 | 44     |      | Literatur                       |
| 195    | Weinberg                              | Jehuda Louis    |                                  |                 |                                                                                                                   |                 |                  |                 | Der Rubaijat des Omar Chajjam                                                                                       |                                                                                        | (Dem Andenken meines Freundes Dr. Felix Danziger)                                                                                |                                           | Edition Olympia - Martin Feuchtwanger | Tel Aviv        | 1940 | 170    |      | Literatur                       |
| 196    | Straus                                | Rahel           |                                  |                 |                                                                                                                   |                 |                  |                 | Mutter und werdendes Kind                                                                                           | Mutter und Säugling                                                                    |                                                                                                                                  |                                           | Edition Dr. Peter Freund              | Jerusalem       | 1943 | 24     |      | Alltags- und Gebrauchsliteratur |
| 197    | Smilansky                             | Moshe           |                                  |                 | Hauptbüro des Keren Kayemeth Leisrael Jerusalem                                                                   |                 |                  |                 | Erlöser des Bodens                                                                                                  |                                                                                        |                                                                                                                                  |                                           | Azriel Printing Works                 | Jerusalem       | 1949 | 70     |      | Geschichte                      |
| 198    | Heinberg                              | Julius          |                                  |                 |                                                                                                                   |                 |                  |                 | Eine Stimme vom französischen Carmel                                                                                |                                                                                        | Ausgewählte Gedichte                                                                                                             |                                           | Azil Haruah (Der Schöngest)           | Haifa           | 1946 | 112    |      | Literatur                       |
| 199    | Tolnai                                | A.              |                                  |                 |                                                                                                                   |                 |                  |                 | 15 jüdische (sic) Geschichten aus der Slovakai                                                                      |                                                                                        |                                                                                                                                  |                                           | Sinai                                 | Tel Aviv        | o.J. | 92     |      | Literatur                       |
| 200    | Stern                                 | Arthur          |                                  |                 |                                                                                                                   |                 |                  |                 | Die genetische Tragödie der Familie Herzl                                                                           | Eine soziologisch-psychiatrische Studie                                                | Vortrag von Dr. Arthur Stern, Nervenarzt, Jerusalem. Gehalten am 11.1. 1965 in der David Yellin Loge B'nei Brith Haus, Jerusalem | Schriftenreihe der David Yellin Loge, 2   | Druckerei "Achwa"                     | Jerusalem       | 1965 | 37     |      | Wissenschaft                    |
| 201    | Rosenheim                             | Uri             |                                  |                 |                                                                                                                   |                 |                  |                 | Leuchtkugeln                                                                                                        |                                                                                        | Erster Band, Teil 1                                                                                                              |                                           | M. Noy                                | Tel Aviv        | 1974 | 140    |      | Literatur                       |
| 202    | Alija Chadascha                       |                 |                                  |                 |                                                                                                                   |                 |                  |                 | Biltorismus und "Aktivismus"                                                                                        | Kampfschrift der Alija Chadascha gegen die Politik der Exekutive der Jewish Agency     |                                                                                                                                  |                                           | "Gesher" Press                        | Jerusalem       | o.J. |        |      | Politik                         |
| 203    | Weizmann                              | Chaim           |                                  |                 | Zentralbüro der Zionistischen Organisation, Jerusalem                                                             |                 |                  |                 | Das jüdische Volk und Palästina                                                                                     |                                                                                        | Erklärung vor der königlichen Palästina-Kommission in Jerusalem am 25. November 1936                                             |                                           | Buchdruckerei Azriel                  | Jerusalem       | 1937 | 30     |      | Politik                         |
| 204    | Klötzel                               | C. Z.           |                                  |                 | Keren Kayemeth Leisrael und Keren Hayesod                                                                         |                 |                  |                 | Emek Chefer                                                                                                         | Ein neues Kolonisationswerk in Erez Israel. Die Geschichte einer friedlichen Eroberung |                                                                                                                                  |                                           | Palestine Publishing Co. Ltd.         | Tel Aviv        | 1936 | 36     |      | Geschichte                      |
| 205    | Alija Chadascha Owedeth               |                 |                                  |                 |                                                                                                                   |                 |                  |                 | Die Histadruth                                                                                                      | Ihre Organisation und Institutionen                                                    |                                                                                                                                  |                                           | "Haaretz" Press                       | Tel Aviv        | 1944 | 90     |      | Geschichte                      |
| 206    | Rosenzweig                            | Siegfried       |                                  |                 |                                                                                                                   |                 |                  |                 | Aus meinem Leben im Galuth u. in Israel                                                                             |                                                                                        |                                                                                                                                  |                                           | Druckerei "Eylon"                     | Tel Aviv        | 1956 | 66     |      | Literatur                       |
| 207    | Ben Izchaky                           | Saul            |                                  |                 |                                                                                                                   |                 |                  |                 | Das Nationalheim                                                                                                    | Ein Vorschlag zur Lösung des jüdisch-arabischen Konfliktes                             |                                                                                                                                  |                                           | Warhaftig's Press                     | Haifa           | 1936 | 31     |      | Politik                         |
| 208    |                                       |                 |                                  |                 |                                                                                                                   |                 |                  |                 | Illustrierter Preiskatalog für Apotheker, Laboratorien, Krankenhauseinrichtungen und Pharmaceutische Bedarfsartikel |                                                                                        |                                                                                                                                  |                                           | Printing "Herzliah"                   | Tel Aviv        | 1936 |        |      | Alltags- und Gebrauchsliteratur |
| 209    | Moses                                 | Siegfried       |                                  |                 | Irgun Olej Merkaz Europa                                                                                          |                 |                  |                 | Die jüdischen Nachkriegsforderungen                                                                                 |                                                                                        |                                                                                                                                  |                                           | Bitaan                                | Tel Aviv        | 1944 | 69     |      | Geschichte                      |
| 210    | von Weisl                             | Wolfgang        |                                  |                 |                                                                                                                   |                 |                  |                 | Die Juden in der Armees Österreich-Ungarns                                                                          | Illegale Transporte                                                                    |                                                                                                                                  |                                           | Olamenu                               | Tel Aviv        | 1971 | 58     |      | Geschichte                      |

Deutsch-jüdische Quellen aus Israel/Palästina - Liste der 250 in der Datenbank enthaltenen Volltexte  
(insgesamt ca. 25.000 Seiten)

| lfd Nr | Nachname (Autor)                      | Vorname (Autor) | Nachname (Autor) | Vorname (Autor) | Nachname (Hrsg.)                                                   | Vorname (Hrsg.) | Nachname (Hrsg.) | Vorname (Hrsg.) | Titel                                                           | Untertitel                                                                                                    | Titelzusatz                                                                                                    | Reihentitel                                                                   | Verlag                                      | Publikationsort | Jahr   | Umfang    | ISBN | Typ                             |
|--------|---------------------------------------|-----------------|------------------|-----------------|--------------------------------------------------------------------|-----------------|------------------|-----------------|-----------------------------------------------------------------|---------------------------------------------------------------------------------------------------------------|----------------------------------------------------------------------------------------------------------------|-------------------------------------------------------------------------------|---------------------------------------------|-----------------|--------|-----------|------|---------------------------------|
| 211    | Markus                                | Joseph          |                  |                 | "Philosophische Abende"                                            |                 |                  |                 | Untersuchung über den Sinn des Denkens                          | (Über die logische Struktur gedanklicher Vielheiten, Begründung der Richtungslogik, Theorie der Wissenschaft) |                                                                                                                |                                                                               | Mafil Ltd.                                  | Tel Aviv        | 1950   | 42        |      | Religion/Philosophie            |
| 212    | Stern                                 | Gerson          |                  |                 |                                                                    |                 |                  |                 | Stille Wege                                                     |                                                                                                               | Verse                                                                                                          | Edition Dr. Peter Freund, No. 28                                              | Edition Dr. Peter Freund                    | Jerusalem       | 1945   | 26        |      | Literatur                       |
| 213    | Lyons Bar David                       | Molly           |                  |                 | Telma Hausfrauendienst                                             |                 |                  |                 | Ausgewählte Internationale Gerichte und Kuriosa um den Kochherd |                                                                                                               | Illustrationen: Gabriella Rosenthal                                                                            |                                                                               | o.V.                                        | o.O.            | o.J.   |           |      | Alltags- und Gebrauchsliteratur |
| 214    |                                       |                 |                  |                 | Yad Vashem, Jerusalem, Forschungs- und Gedenkstätte                |                 |                  |                 | Der Holocaust                                                   |                                                                                                               |                                                                                                                |                                                                               | o.V.                                        | Jerusalem       | 1979   |           |      | Geschichte                      |
| 215    | Marx                                  | Leopold         |                  |                 |                                                                    |                 |                  |                 | Hachscharah                                                     |                                                                                                               | Gedichte                                                                                                       | Edition Dr. Peter Freund No. 14                                               | Edition Dr. Peter Freund                    | Jerusalem       | 1942   | 38        |      | Literatur                       |
| 216    |                                       |                 |                  |                 | Abteilung für Handel und Industrie der Jewish Agency for Palestine |                 |                  |                 | Palästina                                                       | Industrie, Handel und Verkehr                                                                                 | Informationsbuch                                                                                               |                                                                               | Central Press                               | Jerusalem       | 1939   | 152       |      | Geschichte                      |
| 217    |                                       |                 |                  |                 |                                                                    |                 |                  |                 | Beth-Jizchak                                                    | Zwanzig Jahre unseres Lebens                                                                                  |                                                                                                                |                                                                               | o.V.                                        | o.O.            | [1959] | 60        |      | Geschichte                      |
| 218    | Sari                                  | Gerson          |                  |                 |                                                                    |                 |                  |                 | Schlomo geht zur Stadt                                          |                                                                                                               | Schauspiel in fünf Akten                                                                                       | Edition Dr. Peter Freund No. 6                                                | Edition Dr. Peter Freund                    | Jerusalem       | 1941   | 80        |      | Literatur                       |
| 219    |                                       |                 |                  |                 | Jewish Agency, Keren Kayemeth & Keren Hajessod                     |                 |                  |                 | Das zionistische Amtshaus                                       |                                                                                                               | Text von Hermann Swet                                                                                          |                                                                               | Beth Dfus Leumi, Ltd.                       | Jerusalem       | 1936   | 31        |      | Politik                         |
| 220    | Shabbetai                             | K.              |                  |                 |                                                                    |                 |                  |                 | Wie Schafe zur Schlachtbank?                                    |                                                                                                               | Aus dem Hebräischen von Emanuel Bin Gorion                                                                     |                                                                               | Verlag Keschew                              | Beit-Dagon      | 1965   | 91        |      | Geschichte                      |
| 221    | Harkabi                               | Jehoschafat     |                  |                 |                                                                    |                 |                  |                 | das problem der palaestiner                                     | israelische akademische kommittee fuer nahost                                                                 |                                                                                                                |                                                                               | Isratypeset                                 | Jerusalem       | 1973   |           |      | Politik                         |
| 222    |                                       |                 |                  |                 | Frauen-Organisation des Waad Taharat Hamischpacha in Jeruschalajim |                 |                  |                 | An die jüdische Frau                                            |                                                                                                               | Ins Deutsche übertragen von Rabbiner Dr. Isak Unna und Dr. ed. Willy Hofmann                                   |                                                                               | o.V.                                        | o.O.            | o.J.   |           |      | Geschichte                      |
| 223    | Deutsch                               | D. A.           |                  |                 |                                                                    |                 |                  |                 | Das neue Wort                                                   | Zum wirtschaftlichen Problem                                                                                  | II                                                                                                             |                                                                               | Verlag der "Neuen Vereinigung"              | Tel Aviv        | o.J.   |           |      | Geschichte                      |
| 224    | Prai                                  | Eleasar         |                  |                 |                                                                    |                 |                  |                 | Was geht in Palaestina vor?                                     | Eine Marksisitische Analyse der letzten Ereignisse                                                            |                                                                                                                |                                                                               | Verlag des Hakibuz Haarzi "Hashomer Hazair" | Tel Aviv        | 1936   | 64        |      | Politik                         |
| 225    | Politzer                              | Heinz           |                  |                 |                                                                    |                 |                  |                 | Ansprache zum Gedächtnis des Malers Ludwig Jonas, 1887-1942     | Gehalten von Heinz Politzer in Jerusalem am 13. Februar 1943                                                  |                                                                                                                |                                                                               | Edition Dr. Peter Freund                    | Jerusalem       | 1943   | 7 Bl.     |      | Geschichte                      |
| 226    | Friedländer                           | Ali             |                  |                 |                                                                    |                 |                  |                 | Mädchen auf der Chouch                                          |                                                                                                               |                                                                                                                |                                                                               | Lidor Printing Press                        | Tel Aviv        | 1947   | 32        |      | Literatur                       |
| 227    | Kuhn                                  | Chaim Heinrich  |                  |                 |                                                                    |                 |                  |                 | Juden und Araber                                                | Eine Historische Rueck- und Vorschau                                                                          | Eine Antwort auf Bevins Behauptung, zwischen Juden und Arabern herrsche eine 2000 Jahre alte Feindschaft       |                                                                               | Edition Olympia - Martin Feuchtwanger       | Tel Aviv        | o.J.   | 31        |      | Geschichte                      |
| 228    | Shikmoni                              | G. H.           |                  |                 |                                                                    |                 |                  |                 | Humanistisches Judentum                                         | Erbe und Aufgabe                                                                                              | Ein Essay. Geleitwort von Albert Einstein. (Hektografie)                                                       |                                                                               | Stencilled in Palestine by C. Ullmann       | Haifa           | 1948   | 25 Bl.    |      | Geschichte                      |
| 229    | Patai                                 | Josef           |                  |                 |                                                                    |                 |                  |                 | Herzl                                                           |                                                                                                               | Mit 10 Abbildungen                                                                                             |                                                                               | Omanuth Co. Ltd.                            | Tel Aviv        | 1936   | xiii, 319 |      | Geschichte                      |
| 230    | Kraft                                 | Werner          |                  |                 |                                                                    |                 |                  |                 | Wort aus der Leere                                              |                                                                                                               | Ausgewählte Gedichte (Bd. I von Gedichte II und III)                                                           |                                                                               | M. Rothschild                               | Jerusalem       | 1937   | 24        |      | Literatur                       |
| 231    | Strauss                               | Ludwig          |                  |                 |                                                                    |                 |                  |                 | Gedichte 1934-1940                                              |                                                                                                               |                                                                                                                | Edition Dr. Peter Freund No. 2                                                | Edition Dr. Peter Freund                    | Jerusalem       | 1941   | 20        |      | Literatur                       |
| 232    | Bialik                                | Hayyim Nahman   |                  |                 |                                                                    |                 |                  |                 | Der Waldsee                                                     |                                                                                                               | Aus dem Hebr. übers. von Th. Hantke                                                                            |                                                                               | Todros Verlag                               | Jerusalem       | 1962   | 8 Bl.     |      | Literatur                       |
| 233    | Marmorosch                            | A.(braham)      |                  |                 |                                                                    |                 |                  |                 | Alte und neue Stätten in Palästina und Südsyrien                | Ein moderner Führer                                                                                           | (2. verb. Aufl. 1934)                                                                                          |                                                                               | Buchdruckerei Azriel                        | Jerusalem       | 1931   | V, 231    |      | Alltags- und Gebrauchsliteratur |
| 234    | Rabinowitsch                          | Wolf            |                  |                 |                                                                    |                 |                  |                 | Der Karliner Chassidismus                                       | Seine Geschichte und Lehre                                                                                    | Mit einem Geleitwort von Simon Dubnow                                                                          | (Schriften der Gesellschaft zur Förderung der Wissenschaft des Judentums, 40) | Hershbaum                                   | Tel Aviv        | 1935   | 129       |      | Religion/Philosophie            |
| 235    | Bloch                                 | Nahman Mordecai |                  |                 |                                                                    |                 |                  |                 | Verbrechen des Imperialismus                                    | Ein Beitrag zur Geschichte des Zweiten Weltkrieges                                                            |                                                                                                                |                                                                               | Lidor Press                                 | Tel Aviv        | 1965   | 314       |      | Geschichte                      |
| 236    |                                       |                 |                  |                 |                                                                    |                 |                  |                 | Blick auf das Land                                              | Neue Palästina-Bilder                                                                                         | Ausgewählt von J. Gal-Eser; mit einer Einführung und begleitenden Texten von C.Z. Kloetzel. (Titel auch hebr.) |                                                                               | Palestine Pub. Co.                          | Tel Aviv        | ??     | [40]      |      | Geschichte                      |
| 237    |                                       |                 |                  |                 | Politzer                                                           | Heinz           |                  |                 | Die goldene Gasse                                               | Jüdische Sagen und Legenden                                                                                   | Auswahl aus den Sippurim. Hg. u. sprachlich neu gefaßt von Heinz Politzer. Bilder von Friedrich Feigl          |                                                                               | Löwit                                       | Wien/Jerusalem  | 1937   | 272       |      | Literatur                       |
| 238    | Abeles                                | Otto            |                  |                 |                                                                    |                 |                  |                 | Begegnung mit Juden                                             |                                                                                                               |                                                                                                                |                                                                               | Löwit                                       | Wien/Jerusalem  | 1936   | 162       |      | Literatur                       |
| 239    | Ka-Zetnik 135633 (i.e. Yehiel De-Nur) |                 |                  |                 |                                                                    |                 |                  |                 | Daniela                                                         |                                                                                                               |                                                                                                                |                                                                               | Amarilis Verlag                             | Tel Aviv        | 1980   | 329       |      | Literatur                       |



Deutsch-jüdische Quellen aus Israel/Palästina - Liste der 250 in der Datenbank enthaltenen Volltexte  
(insgesamt ca. 25.000 Seiten)

| lfd Nr | Nachname (Autor)              | Vorname (Autor) | Nachname (Autor) | Vorname (Autor)                                                    | Nachname (Hrsg.)                                          | Vorname (Hrsg.) | Nachname (Hrsg.) | Vorname (Hrsg.) | Titel                                   | Untertitel                                  | Titelzusatz                                          | Reihentitel                     | Verlag                   | Publikationsort | Jahr      | Umfang | ISBN | Typ                             |
|--------|-------------------------------|-----------------|------------------|--------------------------------------------------------------------|-----------------------------------------------------------|-----------------|------------------|-----------------|-----------------------------------------|---------------------------------------------|------------------------------------------------------|---------------------------------|--------------------------|-----------------|-----------|--------|------|---------------------------------|
| 240    |                               |                 |                  |                                                                    | Zionistisches Informationsbüro für Touristen in Palästina |                 |                  |                 | Führer durch das neue Palästina         |                                             | (6. Aufl.)                                           |                                 | Azriel                   | Jerusalem       | 1931/1932 | 86     |      | Alltags- und Gebrauchsliteratur |
| 241    | Wertheim                      | Gertrud         |                  |                                                                    |                                                           |                 |                  |                 | Gedichte                                |                                             |                                                      | Edition Dr. Peter Freund, No 15 | Edition Dr. Peter Freund | Jerusalem       | 1942      | 11     |      | Literatur                       |
| 242    | Kraft                         | Werner          |                  |                                                                    |                                                           |                 |                  |                 | Wort aus der Leere                      |                                             | Ausgewählte Gedichte                                 |                                 | M. Rothschild            | Jerusalem       | 1937      | 24     |      | Literatur                       |
| 243    | Miflegeth Poalej Eretz-Israel |                 |                  |                                                                    |                                                           |                 |                  |                 | Wer fürchtet sich vor den Wählermassen? |                                             |                                                      |                                 | Achdut                   | Tel Aviv        | 1941      | 8      |      | Politik                         |
| 244    |                               |                 |                  |                                                                    | Gold                                                      | Hugo            |                  |                 | Geschichte der Juden in der Bukowina    |                                             | Ein Sammelwerk. Bd. 1. [Bis zum Jahre 1919]          |                                 | Olamenu                  | Tel Aviv        | 1958      | 172    |      | Geschichte                      |
| 245    | Weinberg                      | Jehuda Louis    |                  |                                                                    |                                                           |                 |                  |                 | Sang aus dem Morgenland                 | Hebraisch-Arabischer Diwan des Assaf Halevi | (Hektografie. Handgeschrieben von Berta Kraus-Rosen) |                                 | Mafil                    | Tel Aviv        | 1955      | 132    |      | Literatur                       |
| 246    |                               |                 |                  | Frauen-Organisation des Waad Taharat Hamischpacha in Jeruschalajim |                                                           |                 |                  |                 | An die jüdische Frau                    |                                             | Ins Deutsche übertragen                              |                                 | "Horev" Press            | Jerusalem       | o.J.      | [30]   |      | Politik                         |
